# Supplementary material for: Integrative genomic analysis reveals low T-cell infiltration as the primary feature of tobacco use in HPV-positive oropharyngeal cancer
Source: PubMed Central journal article supplement — iScience. 2022 Apr 6;25(5):104216. doi: 10.1016/j.isci.2022.104216 (PMC9044176; doi:10.1016/j.isci.2022.104216), 2022-04-06
Supplement: mmc1.pdf [file mmc1.pdf]

**Supplemental information**

**Integrative genomic analysis reveals low T-cell  
infiltration as the primary feature of tobacco  
use in HPV-positive oropharyngeal cancer**

**Benjamin M. Wahle, Paul Zolkind, Ricardo J. Ramirez, Zachary L. Skidmore, Sydney R. Anderson, Angela Mazul, D. Neil Hayes, Vlad C. Sandulache, Wade L. Thorstad, Douglas Adkins, Obi L. Griffith, Malachi Griffith, and Jose P. Zevallos**

**Figure S1**

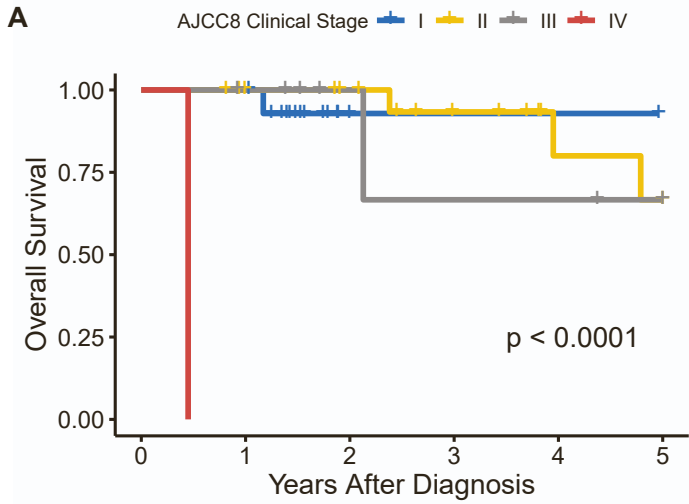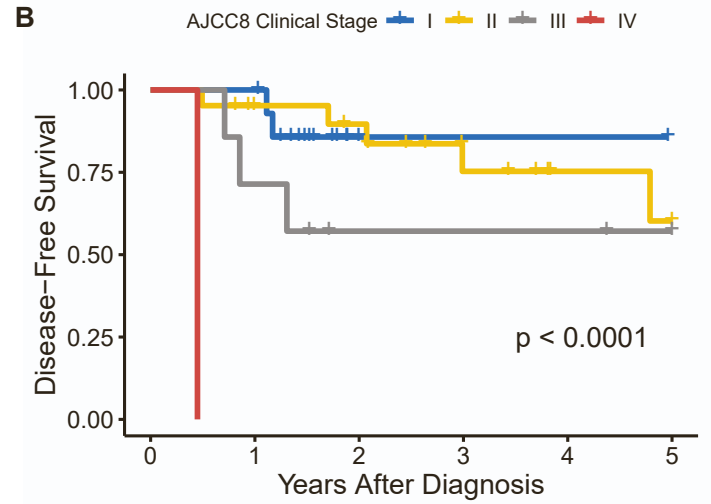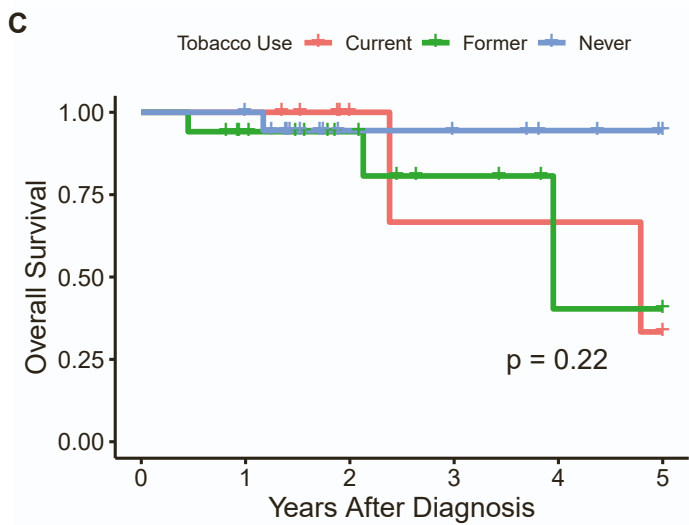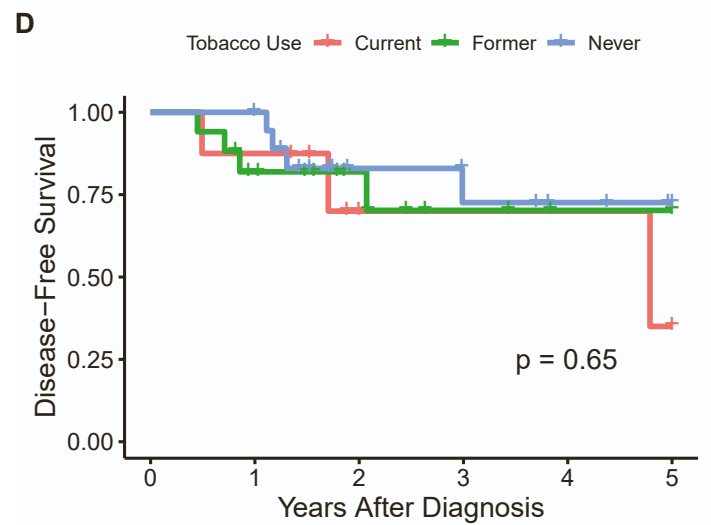

Figure S2

A

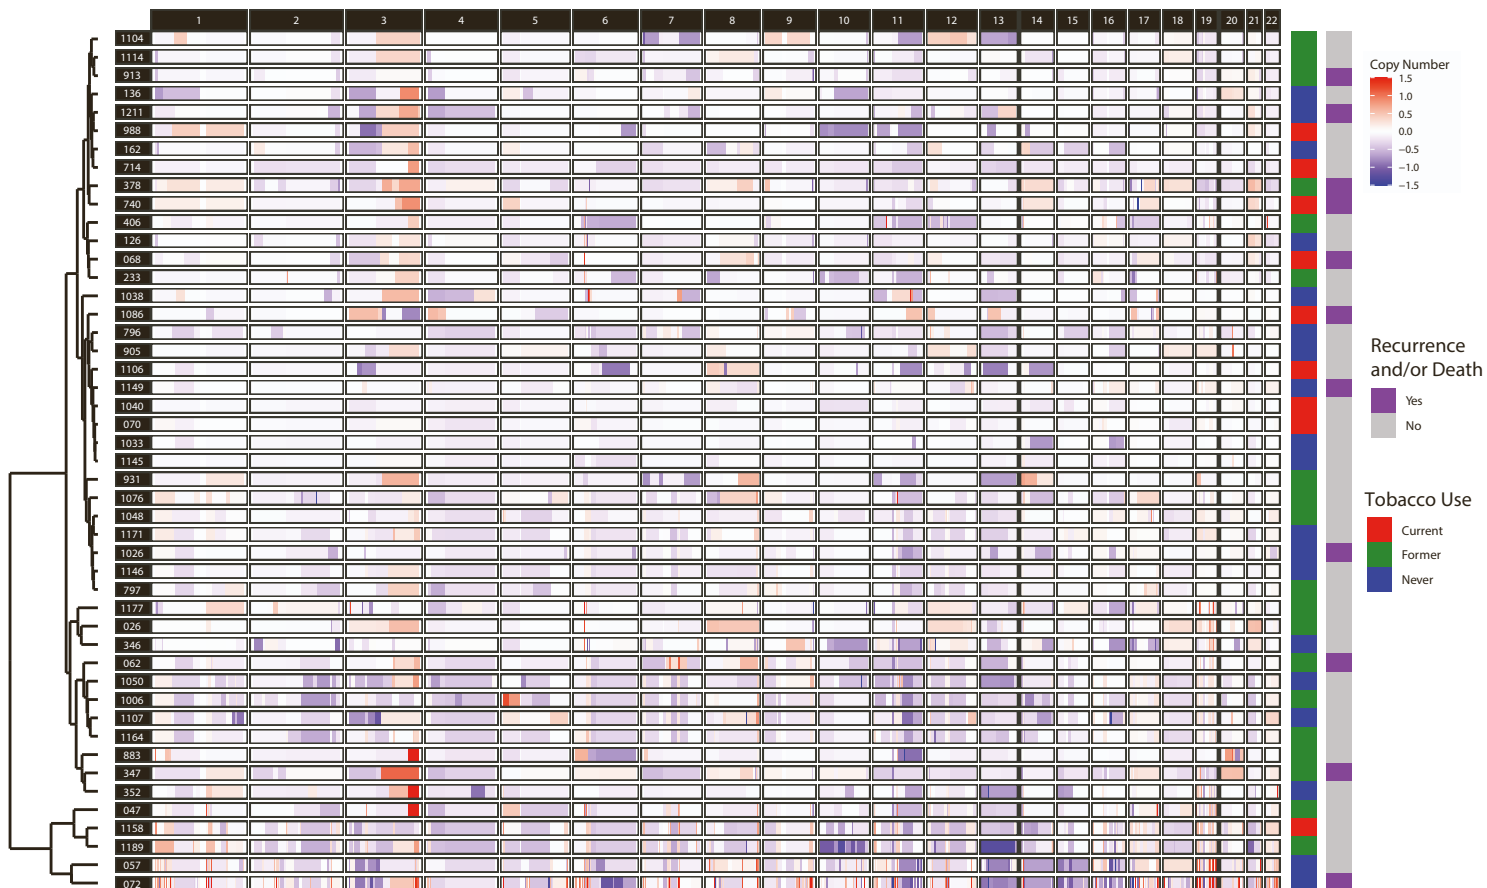

B

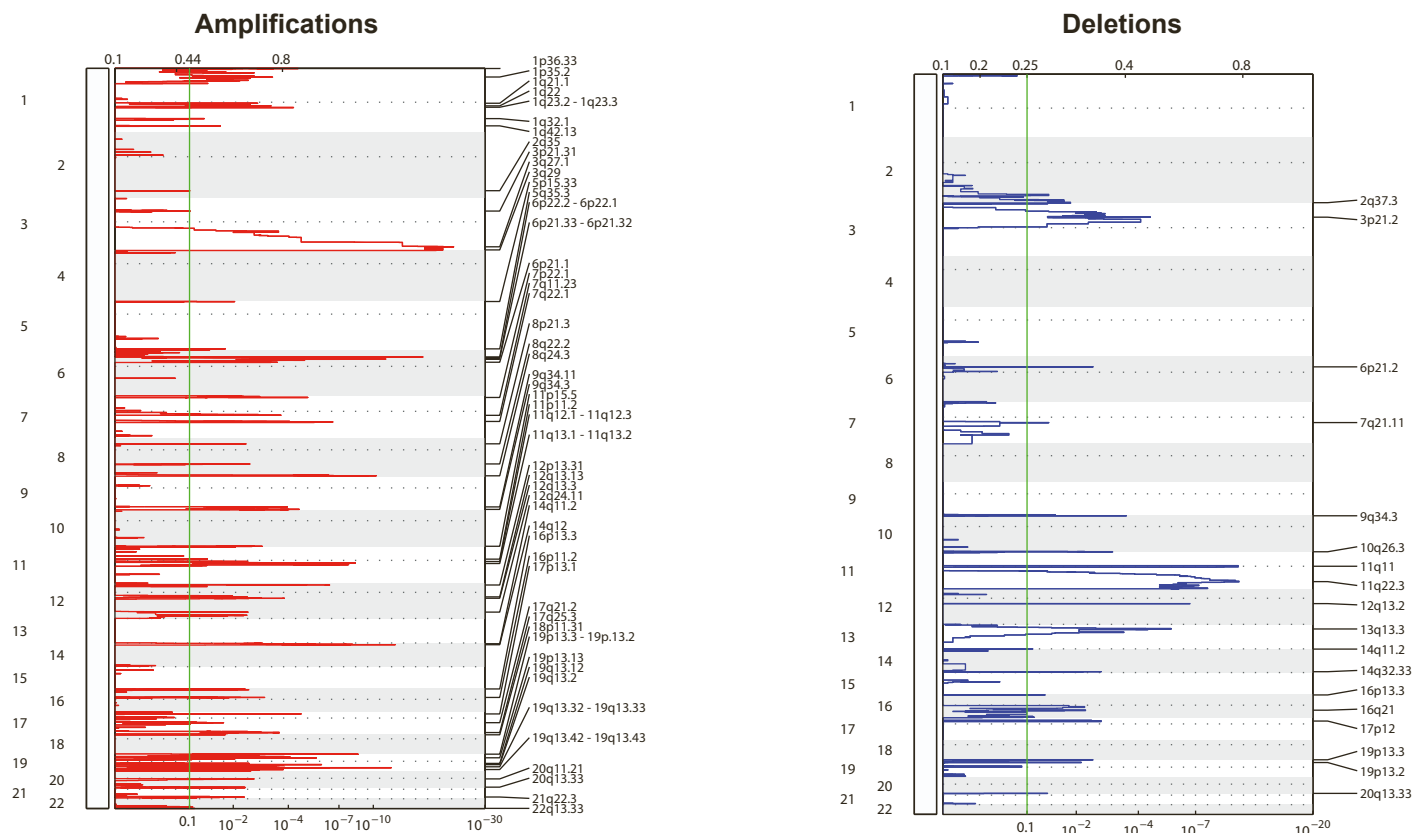

**Figure S3**

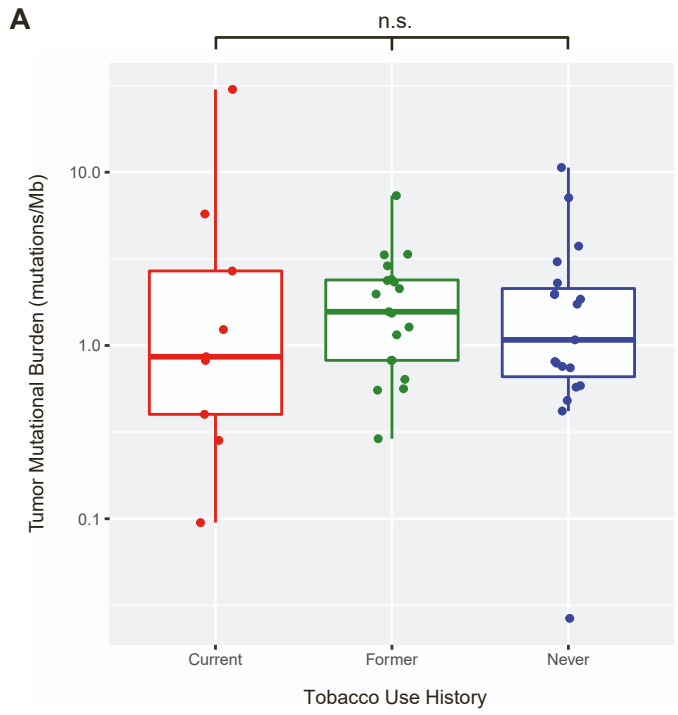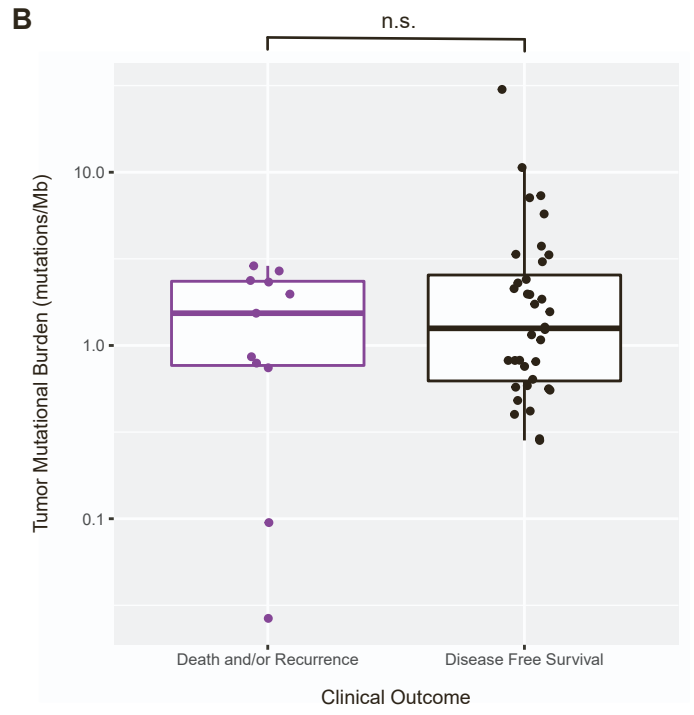

Figure S4

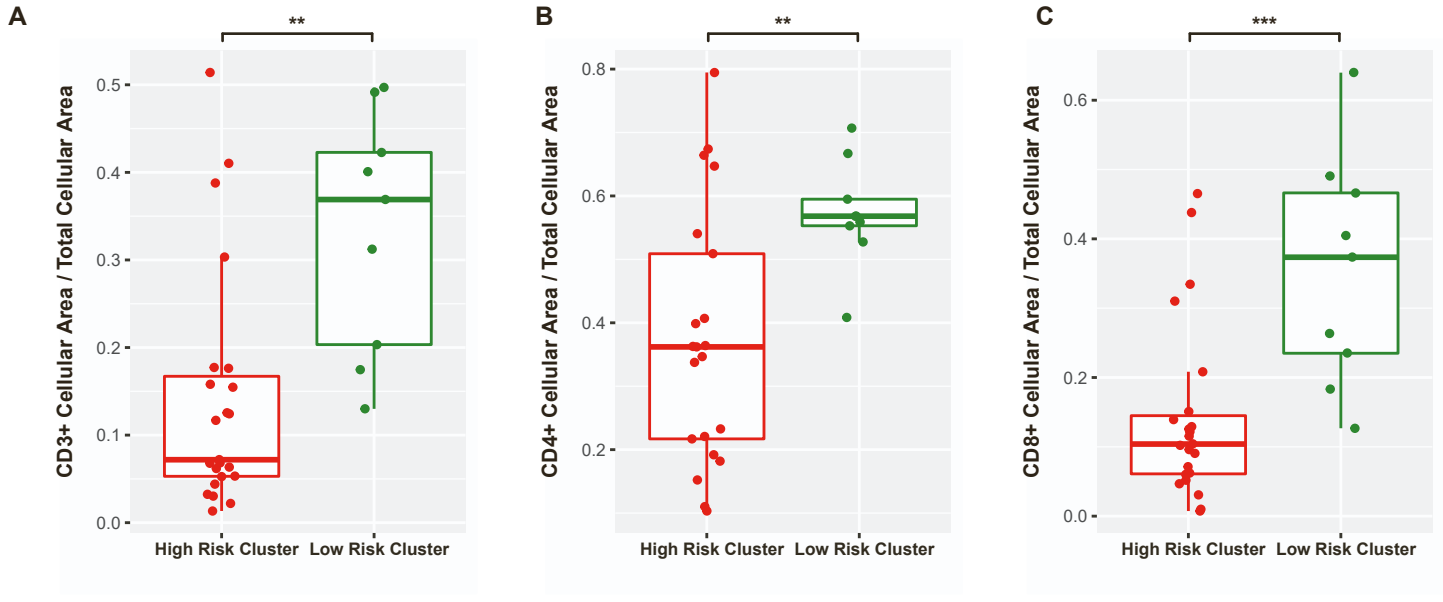

Figure S5

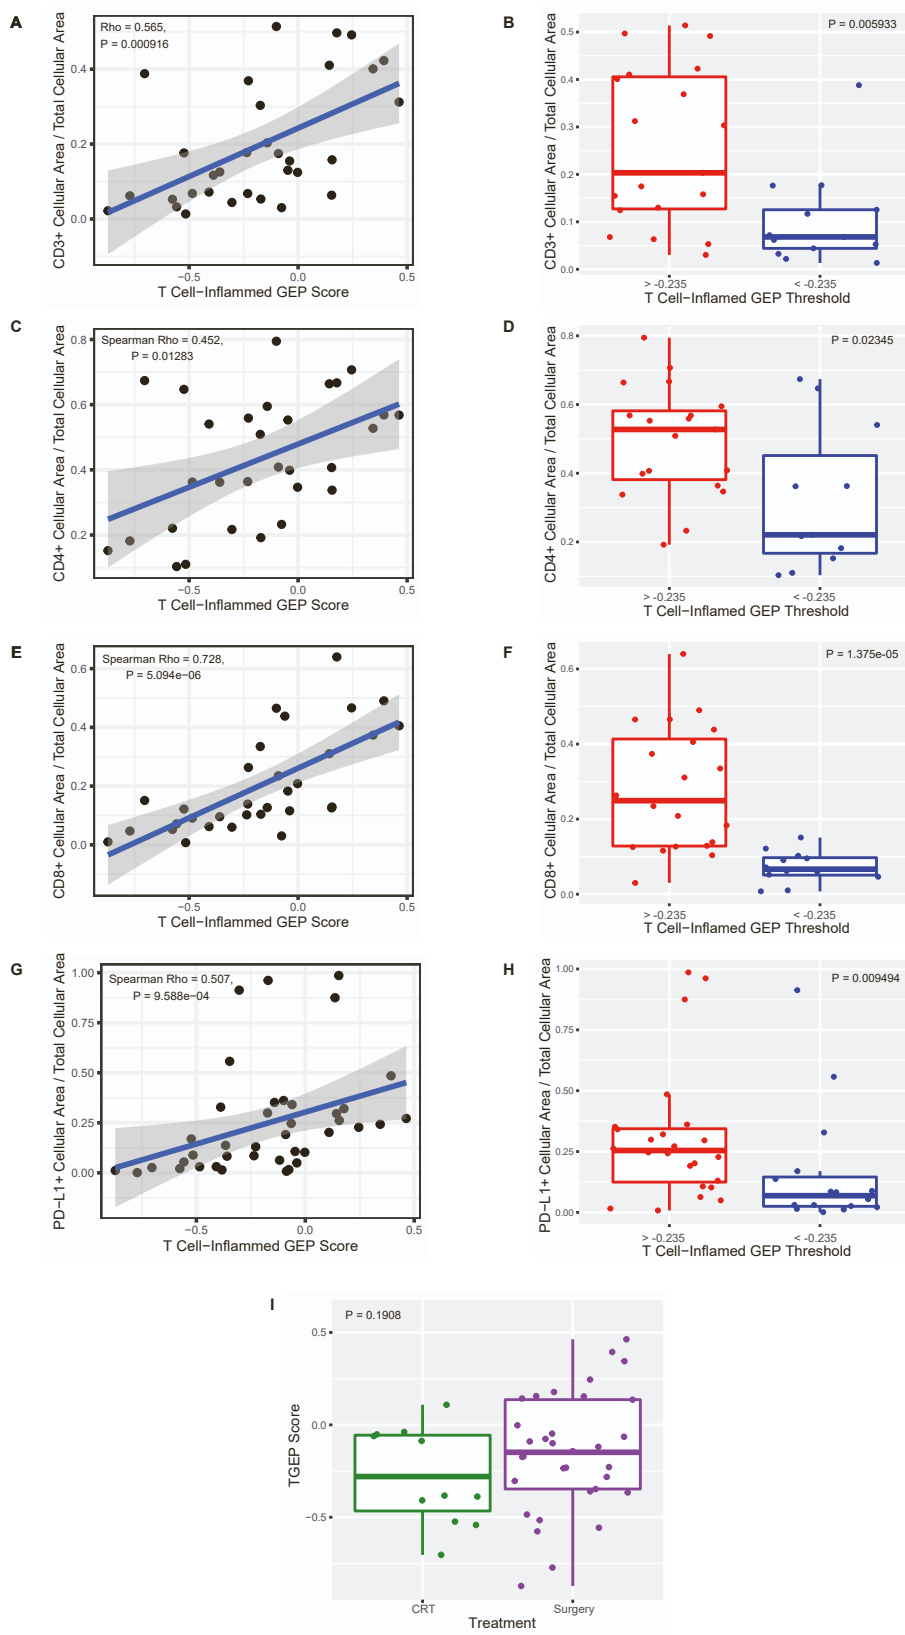

**Figure S6**

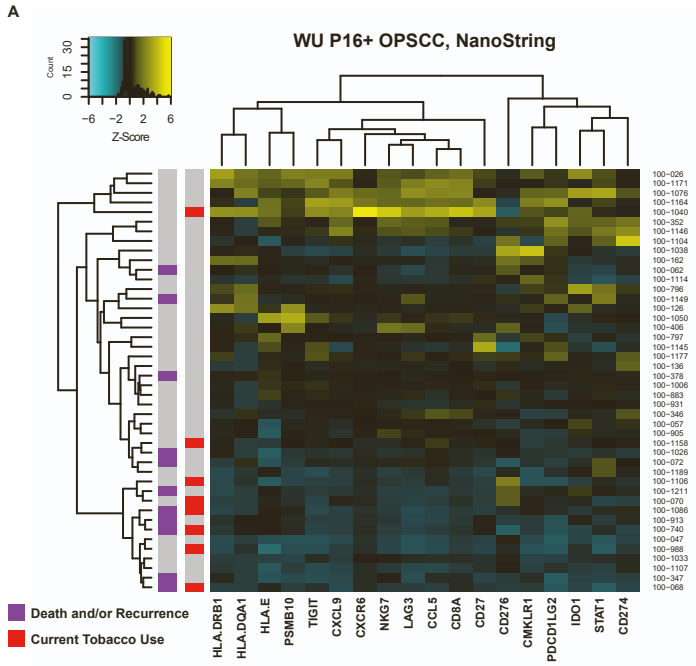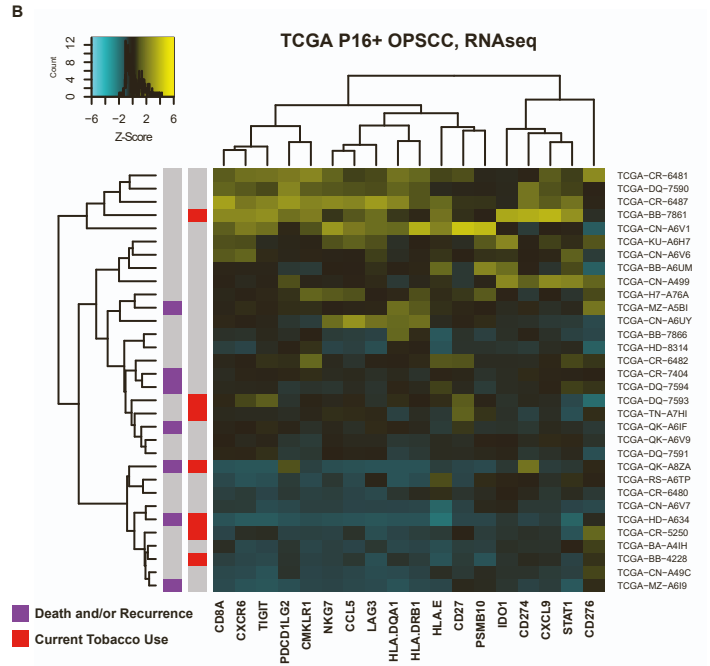

**Figure S7**

**CD8+ with hematoxylin**

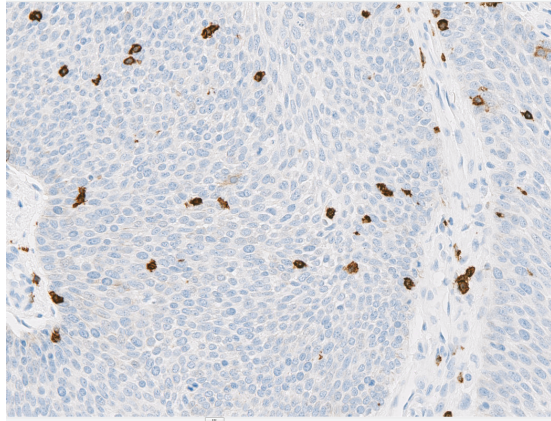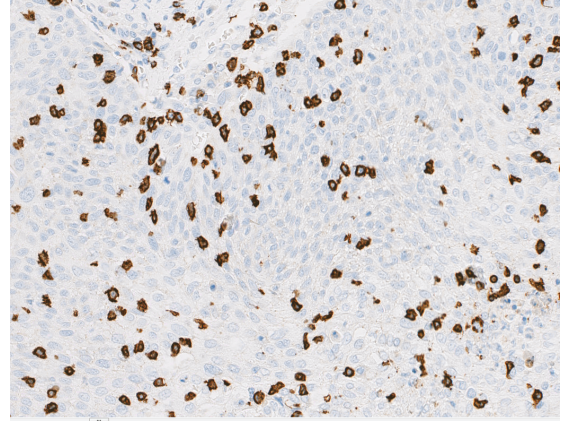

**Scored images  
after RGB filters**

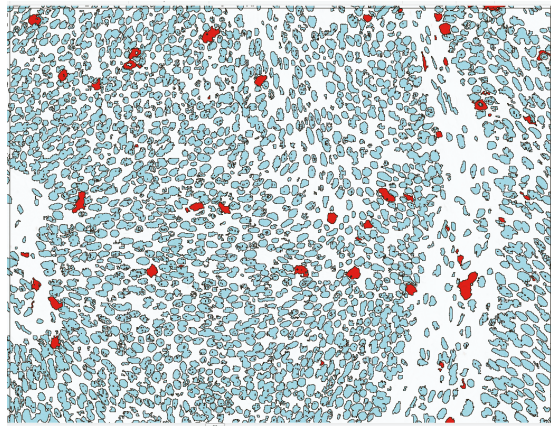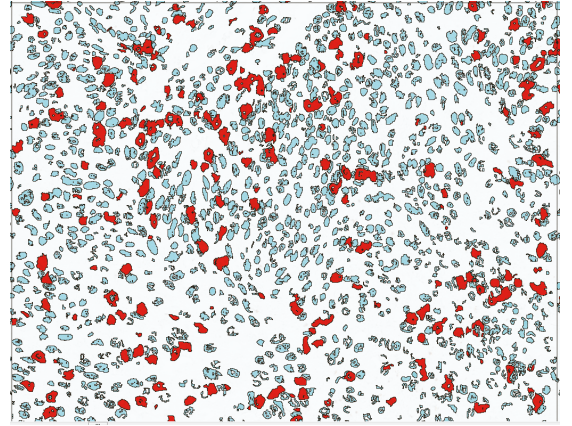



## SUPPLEMENTAL FIGURE LEGENDS

**Figure S1:** Survival analyses for disease stage and tobacco use; related to Table 1. Significant differences in **(A)** OS and **(B)** DFS were present by AJCC 8<sup>th</sup> Edition Clinical Stage (both Log-rank  $P < 0.001$ ). No significant differences in **(C)** OS and **(D)** DFS were present by tobacco use history (Log-rank  $P = 0.220$  and  $0.650$ , respectively).

**Figure S2:** Copy number alterations in HPV(+) OPSCC; related to Figure 1. **(A)** Heatmap displaying copy number alterations for each sample (rows) and chromosome (columns). Clinical annotation is included on the left margin. **(B)** GISTIC plots for focal amplifications and deletions in our cohort.

**Figure S3:** Tumor mutational burden analysis by clinical features; related to Figure 1. No significant differences in tumor mutational burden were present on the basis of **(A)** tobacco use history or **(B)** disease-free survival at five years (Kruskal-Wallis and Wilcoxon tests, respectively; n.s. = not significant).

**Figure S4:** IHC confirmation of unsupervised clustering results; related to Figure 4. ORA revealed that gene cluster 4 was significantly enriched for adaptive immune-related pathways. IHC confirmed that the low-risk patient cluster, which had high expression of gene cluster 4, had significantly greater infiltration of **(A)** CD3+, **(B)** CD4+ and **(C)** CD8+ cells. (\*\* Wilcoxon  $P < 0.01$ , \*\*\*  $P < 0.001$ , all FDR  $< 0.1$ ).

**Figure S5:** IHC validation of TGEF scores; related to Figure 5. TGEF scores were significantly correlated with IHC staining of **(A)** CD3, **(B)** CD4, and **(C)** PD-L1 (all  $P < 0.05$  and FDR  $< 0.1$ ). **(D)** No significant differences in TGEF scores were present on the basis of primary treatment modality (primary chemoradiation versus surgery, Welch's T test  $P = 0.191$ ), suggesting that tissue sourcing (biopsy versus primary surgical specimen) does not represent a source of bias.

**Figure S6:** Cross-platform comparison of TGEF transcript expression; related to Figure 5. Scaled transcript expression was clustered in **(A)** the study cohort and **(B)** p16(+) OPSCC samples from TCGA, then annotated with current tobacco status and death and/or recurrence.

**Figure S7:** Representative images of high-resolution digital analysis of IHC staining; related to STAR Methods. Custom red-green-blue (RGB) color filters were programmed which reliably distinguished and quantified areas of 3,3'-diaminobenzidine stained cells (red), hematoxylin stained cells (blue), and acellular background (white) over the entirety of a sample. Example images show original images at 20x magnification (top panels) and the same regions after application of filters (bottom panels).
